# Supplementary material for: Didymin improves UV irradiation resistance in C. elegans
Source: PeerJ. 2019 Jan 9;6:e6218. doi: 10.7717/peerj.6218 (PMC6330030; doi:10.7717/peerj.6218)
Supplement: Supplemental Information 2 [file peerj-07-6218-s002.xlsx]

## Sheet: figure 2
concentration of didymin	0 mM	0.1 mM		concentration of didymin	0 mM	0.1 mM		concentration of didymin	0 mM	0.1 mM
survival days of NO.1 worm after UV irradiation	0.5	0.5		survival hours of NO.1 worm after 35℃ heat shock	3	3		survival hours of NO.1 worm after juglone stress	1	2
survival days of NO.2 worm after UV irradiation	0.5	0.5		survival hours of NO.2 worm after 35℃ heat shock	3	3		survival hours of NO.2 worm after juglone stress	1	2
survival days of NO.3 worm after UV irradiation	0.5	0.5		survival hours of NO.3 worm after 35℃ heat shock	3	3		survival hours of NO.3 worm after juglone stress	2	3
survival days of NO.4 worm after UV irradiation	0.5	0.5		survival hours of NO.4 worm after 35℃ heat shock	3	3		survival hours of NO.4 worm after juglone stress	2	3
survival days of NO.5 worm after UV irradiation	0.5	1		survival hours of NO.5 worm after 35℃ heat shock	3	3		survival hours of NO.5 worm after juglone stress	2	3
survival days of NO.6 worm after UV irradiation	0.5	1		survival hours of NO.6 worm after 35℃ heat shock	3	3		survival hours of NO.6 worm after juglone stress	2	3
survival days of NO.7 worm after UV irradiation	1	1		survival hours of NO.7 worm after 35℃ heat shock	3	3		survival hours of NO.7 worm after juglone stress	2	4
survival days of NO.8 worm after UV irradiation	1	1		survival hours of NO.8 worm after 35℃ heat shock	3	3		survival hours of NO.8 worm after juglone stress	2	4
survival days of NO.9 worm after UV irradiation	1	1		survival hours of NO.9 worm after 35℃ heat shock	3	3		survival hours of NO.9 worm after juglone stress	2	5
survival days of NO.10 worm after UV irradiation	1	1		survival hours of NO.10 worm after 35℃ heat shock	3	3		survival hours of NO.10 worm after juglone stress	2	5
survival days of NO.11 worm after UV irradiation	1	1		survival hours of NO.11 worm after 35℃ heat shock	3	3		survival hours of NO.11 worm after juglone stress	3	5
survival days of NO.12 worm after UV irradiation	1	1		survival hours of NO.12 worm after 35℃ heat shock	3	3		survival hours of NO.12 worm after juglone stress	3	5
survival days of NO.13 worm after UV irradiation	1	1.5		survival hours of NO.13 worm after 35℃ heat shock	3	4		survival hours of NO.13 worm after juglone stress	3	5
survival days of NO.14 worm after UV irradiation	1	1.5		survival hours of NO.14 worm after 35℃ heat shock	3	4		survival hours of NO.14 worm after juglone stress	3	5
survival days of NO.15 worm after UV irradiation	1.5	1.5		survival hours of NO.15 worm after 35℃ heat shock	3	4		survival hours of NO.15 worm after juglone stress	3	5
survival days of NO.16 worm after UV irradiation	1.5	1.5		survival hours of NO.16 worm after 35℃ heat shock	3	4		survival hours of NO.16 worm after juglone stress	3	5
survival days of NO.17 worm after UV irradiation	1.5	1.5		survival hours of NO.17 worm after 35℃ heat shock	3	4		survival hours of NO.17 worm after juglone stress	4	5
survival days of NO.18 worm after UV irradiation	1.5	1.5		survival hours of NO.18 worm after 35℃ heat shock	3	4		survival hours of NO.18 worm after juglone stress	4	5
survival days of NO.19 worm after UV irradiation	1.5	1.5		survival hours of NO.19 worm after 35℃ heat shock	4	4		survival hours of NO.19 worm after juglone stress	4	6
survival days of NO.20 worm after UV irradiation	1.5	1.5		survival hours of NO.20 worm after 35℃ heat shock	4	4		survival hours of NO.20 worm after juglone stress	4	6
survival days of NO.21 worm after UV irradiation	1.5	1.5		survival hours of NO.21 worm after 35℃ heat shock	4	4		survival hours of NO.21 worm after juglone stress	5	7
survival days of NO.22 worm after UV irradiation	1.5	1.5		survival hours of NO.22 worm after 35℃ heat shock	4	5		survival hours of NO.22 worm after juglone stress	5	7
survival days of NO.23 worm after UV irradiation	1.5	2		survival hours of NO.23 worm after 35℃ heat shock	4	5		survival hours of NO.23 worm after juglone stress	5	7
survival days of NO.24 worm after UV irradiation	1.5	2		survival hours of NO.24 worm after 35℃ heat shock	4	5		survival hours of NO.24 worm after juglone stress	5	7
survival days of NO.25 worm after UV irradiation	1.5	2		survival hours of NO.25 worm after 35℃ heat shock	4	5		survival hours of NO.25 worm after juglone stress	5	8
survival days of NO.26 worm after UV irradiation	1.5	2		survival hours of NO.26 worm after 35℃ heat shock	4	5		survival hours of NO.26 worm after juglone stress	5	8
survival days of NO.27 worm after UV irradiation	1.5	2		survival hours of NO.27 worm after 35℃ heat shock	4	5		survival hours of NO.27 worm after juglone stress	5	9
survival days of NO.28 worm after UV irradiation	1.5	2		survival hours of NO.28 worm after 35℃ heat shock	4	5		survival hours of NO.28 worm after juglone stress	5	9
survival days of NO.29 worm after UV irradiation	2	2		survival hours of NO.29 worm after 35℃ heat shock	4	5		survival hours of NO.29 worm after juglone stress	6	9
survival days of NO.30 worm after UV irradiation	2	2		survival hours of NO.30 worm after 35℃ heat shock	4	5		survival hours of NO.30 worm after juglone stress	6	9
survival days of NO.31 worm after UV irradiation	2	2		survival hours of NO.31 worm after 35℃ heat shock	4	5		survival hours of NO.31 worm after juglone stress	6	9
survival days of NO.32 worm after UV irradiation	2	2		survival hours of NO.32 worm after 35℃ heat shock	4	5		survival hours of NO.32 worm after juglone stress	6	9
survival days of NO.33 worm after UV irradiation	2	2		survival hours of NO.33 worm after 35℃ heat shock	4	5		survival hours of NO.33 worm after juglone stress	6	9
survival days of NO.34 worm after UV irradiation	2	2		survival hours of NO.34 worm after 35℃ heat shock	4	5		survival hours of NO.34 worm after juglone stress	6	9
survival days of NO.35 worm after UV irradiation	2	2		survival hours of NO.35 worm after 35℃ heat shock	4	5		survival hours of NO.35 worm after juglone stress	6	10
survival days of NO.36 worm after UV irradiation	2	2		survival hours of NO.36 worm after 35℃ heat shock	4	5		survival hours of NO.36 worm after juglone stress	6	10
survival days of NO.37 worm after UV irradiation	2	2		survival hours of NO.37 worm after 35℃ heat shock	4	5		survival hours of NO.37 worm after juglone stress	6	10
survival days of NO.38 worm after UV irradiation	2	2		survival hours of NO.38 worm after 35℃ heat shock	4	5		survival hours of NO.38 worm after juglone stress	6	10
survival days of NO.39 worm after UV irradiation	2	2		survival hours of NO.39 worm after 35℃ heat shock	4	5		survival hours of NO.39 worm after juglone stress	6	10
survival days of NO.40 worm after UV irradiation	2	2		survival hours of NO.40 worm after 35℃ heat shock	4	5		survival hours of NO.40 worm after juglone stress	6	10
survival days of NO.41 worm after UV irradiation	2	2		survival hours of NO.41 worm after 35℃ heat shock	4	5		survival hours of NO.41 worm after juglone stress	7	10
survival days of NO.42 worm after UV irradiation	2	2		survival hours of NO.42 worm after 35℃ heat shock	4	5		survival hours of NO.42 worm after juglone stress	7	10
survival days of NO.43 worm after UV irradiation	2	2.5		survival hours of NO.43 worm after 35℃ heat shock	4	5		survival hours of NO.43 worm after juglone stress	7	10
survival days of NO.44 worm after UV irradiation	2	2.5		survival hours of NO.44 worm after 35℃ heat shock	4	5		survival hours of NO.44 worm after juglone stress	7	10
survival days of NO.45 worm after UV irradiation	2	2.5		survival hours of NO.45 worm after 35℃ heat shock	4	5		survival hours of NO.45 worm after juglone stress	7	10
survival days of NO.46 worm after UV irradiation	2	2.5		survival hours of NO.46 worm after 35℃ heat shock	4	5		survival hours of NO.46 worm after juglone stress	7	10
survival days of NO.47 worm after UV irradiation	2	2.5		survival hours of NO.47 worm after 35℃ heat shock	4	5		survival hours of NO.47 worm after juglone stress	7	10
survival days of NO.48 worm after UV irradiation	2	2.5		survival hours of NO.48 worm after 35℃ heat shock	4	5		survival hours of NO.48 worm after juglone stress	7	10
survival days of NO.49 worm after UV irradiation	2.5	2.5		survival hours of NO.49 worm after 35℃ heat shock	4	5		survival hours of NO.49 worm after juglone stress	8	10
survival days of NO.50 worm after UV irradiation	2.5	2.5		survival hours of NO.50 worm after 35℃ heat shock	4	5		survival hours of NO.50 worm after juglone stress	8	10
survival days of NO.51 worm after UV irradiation	2.5	2.5		survival hours of NO.51 worm after 35℃ heat shock	4	5		survival hours of NO.51 worm after juglone stress	8	10
survival days of NO.52 worm after UV irradiation	2.5	2.5		survival hours of NO.52 worm after 35℃ heat shock	4	5		survival hours of NO.52 worm after juglone stress	8	10
survival days of NO.53 worm after UV irradiation	2.5	2.5		survival hours of NO.53 worm after 35℃ heat shock	4	5		survival hours of NO.53 worm after juglone stress	8	10
survival days of NO.54 worm after UV irradiation	2.5	2.5		survival hours of NO.54 worm after 35℃ heat shock	4	5		survival hours of NO.54 worm after juglone stress	8	10
survival days of NO.55 worm after UV irradiation	2.5	2.5		survival hours of NO.55 worm after 35℃ heat shock	4	6		survival hours of NO.55 worm after juglone stress	9	10
survival days of NO.56 worm after UV irradiation	2.5	2.5		survival hours of NO.56 worm after 35℃ heat shock	4	6		survival hours of NO.56 worm after juglone stress	9	10
survival days of NO.57 worm after UV irradiation	2.5	2.5		survival hours of NO.57 worm after 35℃ heat shock	4	6		survival hours of NO.57 worm after juglone stress	9	11
survival days of NO.58 worm after UV irradiation	2.5	2.5		survival hours of NO.58 worm after 35℃ heat shock	4	6		survival hours of NO.58 worm after juglone stress	9	11
survival days of NO.59 worm after UV irradiation	2.5	2.5		survival hours of NO.59 worm after 35℃ heat shock	4	6		survival hours of NO.59 worm after juglone stress	9	11
survival days of NO.60 worm after UV irradiation	2.5	2.5		survival hours of NO.60 worm after 35℃ heat shock	4	6		survival hours of NO.60 worm after juglone stress	9	11
survival days of NO.61 worm after UV irradiation	2.5	2.5		survival hours of NO.61 worm after 35℃ heat shock	4	6		survival hours of NO.61 worm after juglone stress	9	11
survival days of NO.62 worm after UV irradiation	2.5	2.5		survival hours of NO.62 worm after 35℃ heat shock	4	6		survival hours of NO.62 worm after juglone stress	9	11
survival days of NO.63 worm after UV irradiation	2.5	2.5		survival hours of NO.63 worm after 35℃ heat shock	4	6		survival hours of NO.63 worm after juglone stress	9	11
survival days of NO.64 worm after UV irradiation	2.5	2.5		survival hours of NO.64 worm after 35℃ heat shock	4	6		survival hours of NO.64 worm after juglone stress	9	11
survival days of NO.65 worm after UV irradiation	3	2.5		survival hours of NO.65 worm after 35℃ heat shock	4	6		survival hours of NO.65 worm after juglone stress	10	11
survival days of NO.66 worm after UV irradiation	3	2.5		survival hours of NO.66 worm after 35℃ heat shock	4	6		survival hours of NO.66 worm after juglone stress	10	11
survival days of NO.67 worm after UV irradiation	3	3		survival hours of NO.67 worm after 35℃ heat shock	4	6		survival hours of NO.67 worm after juglone stress	10	11
survival days of NO.68 worm after UV irradiation	3	3		survival hours of NO.68 worm after 35℃ heat shock	4	6		survival hours of NO.68 worm after juglone stress	10	11
survival days of NO.69 worm after UV irradiation	3	3		survival hours of NO.69 worm after 35℃ heat shock	4	6		survival hours of NO.69 worm after juglone stress	10	11
survival days of NO.70 worm after UV irradiation	3	3		survival hours of NO.70 worm after 35℃ heat shock	4	7		survival hours of NO.70 worm after juglone stress	10	11
survival days of NO.71 worm after UV irradiation	3	3		survival hours of NO.71 worm after 35℃ heat shock	4	7		survival hours of NO.71 worm after juglone stress	10	11
survival days of NO.72 worm after UV irradiation	3	3		survival hours of NO.72 worm after 35℃ heat shock	4	7		survival hours of NO.72 worm after juglone stress	10	11
survival days of NO.73 worm after UV irradiation	3	3		survival hours of NO.73 worm after 35℃ heat shock	4	7		survival hours of NO.73 worm after juglone stress	10	11
survival days of NO.74 worm after UV irradiation	3	3		survival hours of NO.74 worm after 35℃ heat shock	4	7		survival hours of NO.74 worm after juglone stress	10	11
survival days of NO.75 worm after UV irradiation	3	3		survival hours of NO.75 worm after 35℃ heat shock	4	7		survival hours of NO.75 worm after juglone stress	10	11
survival days of NO.76 worm after UV irradiation	3	3		survival hours of NO.76 worm after 35℃ heat shock	4	7		survival hours of NO.76 worm after juglone stress	10	11
survival days of NO.77 worm after UV irradiation	3	3		survival hours of NO.77 worm after 35℃ heat shock	4	7		survival hours of NO.77 worm after juglone stress	10	11
survival days of NO.78 worm after UV irradiation	3	3		survival hours of NO.78 worm after 35℃ heat shock	4	7		survival hours of NO.78 worm after juglone stress	10	11
survival days of NO.79 worm after UV irradiation	3	3		survival hours of NO.79 worm after 35℃ heat shock	5	7		survival hours of NO.79 worm after juglone stress	10	12
survival days of NO.80 worm after UV irradiation	3	3		survival hours of NO.80 worm after 35℃ heat shock	5	7		survival hours of NO.80 worm after juglone stress	10	12
survival days of NO.81 worm after UV irradiation	3	3		survival hours of NO.81 worm after 35℃ heat shock	5	7		survival hours of NO.81 worm after juglone stress	10	12
survival days of NO.82 worm after UV irradiation	3	3		survival hours of NO.82 worm after 35℃ heat shock	5	7		survival hours of NO.82 worm after juglone stress	10	12
survival days of NO.83 worm after UV irradiation	3.5	3		survival hours of NO.83 worm after 35℃ heat shock	5	7		survival hours of NO.83 worm after juglone stress	10	12
survival days of NO.84 worm after UV irradiation	3.5	3		survival hours of NO.84 worm after 35℃ heat shock	5	7		survival hours of NO.84 worm after juglone stress	10	12
survival days of NO.85 worm after UV irradiation	3.5	3.5		survival hours of NO.85 worm after 35℃ heat shock	5	7		survival hours of NO.85 worm after juglone stress	10	12
survival days of NO.86 worm after UV irradiation	3.5	3.5		survival hours of NO.86 worm after 35℃ heat shock	5	7		survival hours of NO.86 worm after juglone stress	10	12
survival days of NO.87 worm after UV irradiation	3.5	3.5		survival hours of NO.87 worm after 35℃ heat shock	5	7		survival hours of NO.87 worm after juglone stress	11	12
survival days of NO.88 worm after UV irradiation	3.5	3.5		survival hours of NO.88 worm after 35℃ heat shock	5	8		survival hours of NO.88 worm after juglone stress	11	12
survival days of NO.89 worm after UV irradiation	3.5	3.5		survival hours of NO.89 worm after 35℃ heat shock	5	8		survival hours of NO.89 worm after juglone stress	11	12
survival days of NO.90 worm after UV irradiation	3.5	3.5		survival hours of NO.90 worm after 35℃ heat shock	5	8		survival hours of NO.90 worm after juglone stress	11	12
survival days of NO.91 worm after UV irradiation	3.5	3.5		survival hours of NO.91 worm after 35℃ heat shock	5	8		survival hours of NO.91 worm after juglone stress	11	12
survival days of NO.92 worm after UV irradiation	3.5	3.5		survival hours of NO.92 worm after 35℃ heat shock	5	8		survival hours of NO.92 worm after juglone stress	11	12
survival days of NO.93 worm after UV irradiation	3.5	3.5		survival hours of NO.93 worm after 35℃ heat shock	5	8		survival hours of NO.93 worm after juglone stress	11	12
survival days of NO.94 worm after UV irradiation	3.5	3.5		survival hours of NO.94 worm after 35℃ heat shock	5	8		survival hours of NO.94 worm after juglone stress	11	12
survival days of NO.95 worm after UV irradiation	3.5	3.5		survival hours of NO.95 worm after 35℃ heat shock	5	8		survival hours of NO.95 worm after juglone stress	11	13
survival days of NO.96 worm after UV irradiation	3.5	3.5		survival hours of NO.96 worm after 35℃ heat shock	5	8		survival hours of NO.96 worm after juglone stress	11	13
survival days of NO.97 worm after UV irradiation	3.5	3.5		survival hours of NO.97 worm after 35℃ heat shock	7	9		survival hours of NO.97 worm after juglone stress	11	13
survival days of NO.98 worm after UV irradiation	3.5	3.5		survival hours of NO.98 worm after 35℃ heat shock	7	9		survival hours of NO.98 worm after juglone stress	11	13
survival days of NO.99 worm after UV irradiation	4	3.5		survival hours of NO.99 worm after 35℃ heat shock	7	9		survival hours of NO.99 worm after juglone stress	11	13
survival days of NO.100 worm after UV irradiation	4	3.5		survival hours of NO.100 worm after 35℃ heat shock	7	9		survival hours of NO.100 worm after juglone stress	11	13
survival days of NO.101 worm after UV irradiation	4	4		survival hours of NO.101 worm after 35℃ heat shock	7	9		survival hours of NO.101 worm after juglone stress	11	13
survival days of NO.102 worm after UV irradiation	4	4		survival hours of NO.102 worm after 35℃ heat shock	7	9		survival hours of NO.102 worm after juglone stress	11	13
survival days of NO.103 worm after UV irradiation	4	4		survival hours of NO.103 worm after 35℃ heat shock	7	9		survival hours of NO.103 worm after juglone stress	11	14
survival days of NO.104 worm after UV irradiation	4	4		survival hours of NO.104 worm after 35℃ heat shock	7	9		survival hours of NO.104 worm after juglone stress	11	14
survival days of NO.105 worm after UV irradiation	4	4		survival hours of NO.105 worm after 35℃ heat shock	7	9		survival hours of NO.105 worm after juglone stress	11	14
survival days of NO.106 worm after UV irradiation	4	4		survival hours of NO.106 worm after 35℃ heat shock	7	9		survival hours of NO.106 worm after juglone stress	11	14
survival days of NO.107 worm after UV irradiation	4	4		survival hours of NO.107 worm after 35℃ heat shock	7	9		survival hours of NO.107 worm after juglone stress	12	14
survival days of NO.108 worm after UV irradiation	4	4		survival hours of NO.108 worm after 35℃ heat shock	7	9		survival hours of NO.108 worm after juglone stress	12	14
survival days of NO.109 worm after UV irradiation	4.5	4		survival hours of NO.109 worm after 35℃ heat shock	7	9		survival hours of NO.109 worm after juglone stress	12	14
survival days of NO.110 worm after UV irradiation	4.5	4		survival hours of NO.110 worm after 35℃ heat shock	7	9		survival hours of NO.110 worm after juglone stress	12	14
survival days of NO.111 worm after UV irradiation	4.5	4		survival hours of NO.111 worm after 35℃ heat shock	7	9		survival hours of NO.111 worm after juglone stress	12	14
survival days of NO.112 worm after UV irradiation	4.5	4		survival hours of NO.112 worm after 35℃ heat shock	7	9		survival hours of NO.112 worm after juglone stress	12	14
survival days of NO.113 worm after UV irradiation	5	4		survival hours of NO.113 worm after 35℃ heat shock	7	9		survival hours of NO.113 worm after juglone stress	12	14
survival days of NO.114 worm after UV irradiation	5	4		survival hours of NO.114 worm after 35℃ heat shock	7	9		survival hours of NO.114 worm after juglone stress	12	14
survival days of NO.115 worm after UV irradiation	5	4		survival hours of NO.115 worm after 35℃ heat shock	7	11		survival hours of NO.115 worm after juglone stress	12	15
survival days of NO.116 worm after UV irradiation	5	4		survival hours of NO.116 worm after 35℃ heat shock	7	11		survival hours of NO.116 worm after juglone stress	12	15
survival days of NO.117 worm after UV irradiation		4		survival hours of NO.117 worm after 35℃ heat shock	7	11		survival hours of NO.117 worm after juglone stress	12	15
survival days of NO.118 worm after UV irradiation		4		survival hours of NO.118 worm after 35℃ heat shock	8	12		survival hours of NO.118 worm after juglone stress	12	15
survival days of NO.119 worm after UV irradiation		4.5		survival hours of NO.119 worm after 35℃ heat shock	8	12		survival hours of NO.119 worm after juglone stress	12	15
survival days of NO.120 worm after UV irradiation		4.5		survival hours of NO.120 worm after 35℃ heat shock	8	12		survival hours of NO.120 worm after juglone stress	12	15
survival days of NO.121 worm after UV irradiation		4.5		survival hours of NO.121 worm after 35℃ heat shock	9	12		survival hours of NO.121 worm after juglone stress	12	15
survival days of NO.122 worm after UV irradiation		4.5		survival hours of NO.122 worm after 35℃ heat shock	9	12		survival hours of NO.122 worm after juglone stress	12	15
survival days of NO.123 worm after UV irradiation		4.5		survival hours of NO.123 worm after 35℃ heat shock	9	12		survival hours of NO.123 worm after juglone stress	12	15
survival days of NO.124 worm after UV irradiation		4.5		survival hours of NO.124 worm after 35℃ heat shock	9	12		survival hours of NO.124 worm after juglone stress	12	15
survival days of NO.125 worm after UV irradiation		4.5		survival hours of NO.125 worm after 35℃ heat shock	9	12		survival hours of NO.125 worm after juglone stress	13	15
survival days of NO.126 worm after UV irradiation		4.5		survival hours of NO.126 worm after 35℃ heat shock	9	12		survival hours of NO.126 worm after juglone stress	13	15
survival days of NO.127 worm after UV irradiation		4.5		survival hours of NO.127 worm after 35℃ heat shock	9	12		survival hours of NO.127 worm after juglone stress	13	15
survival days of NO.128 worm after UV irradiation		4.5		survival hours of NO.128 worm after 35℃ heat shock	9	12		survival hours of NO.128 worm after juglone stress	13	15
survival days of NO.129 worm after UV irradiation		4.5		survival hours of NO.129 worm after 35℃ heat shock	9	12		survival hours of NO.129 worm after juglone stress	13
survival days of NO.130 worm after UV irradiation		4.5		survival hours of NO.130 worm after 35℃ heat shock	10	12		survival hours of NO.130 worm after juglone stress	13
survival days of NO.131 worm after UV irradiation		4.5		survival hours of NO.131 worm after 35℃ heat shock	10	12		survival hours of NO.131 worm after juglone stress	14
survival days of NO.132 worm after UV irradiation		4.5		survival hours of NO.132 worm after 35℃ heat shock	10	12		survival hours of NO.132 worm after juglone stress	14
survival days of NO.133 worm after UV irradiation		4.5						survival hours of NO.133 worm after juglone stress	14
survival days of NO.134 worm after UV irradiation		4.5						survival hours of NO.134 worm after juglone stress	14
survival days of NO.135 worm after UV irradiation		4.5						survival hours of NO.135 worm after juglone stress	14
survival days of NO.136 worm after UV irradiation		4.5						survival hours of NO.136 worm after juglone stress	14
survival days of NO.137 worm after UV irradiation		5						survival hours of NO.137 worm after juglone stress	15
survival days of NO.138 worm after UV irradiation		5						survival hours of NO.138 worm after juglone stress	15
survival days of NO.139 worm after UV irradiation		5						survival hours of NO.139 worm after juglone stress	15
survival days of NO.140 worm after UV irradiation		5						survival hours of NO.140 worm after juglone stress	15
survival days of NO.141 worm after UV irradiation		5						survival hours of NO.141 worm after juglone stress	15
survival days of NO.142 worm after UV irradiation		5						survival hours of NO.142 worm after juglone stress	15
survival days of NO.143 worm after UV irradiation		5
survival days of NO.144 worm after UV irradiation		5
survival days of NO.145 worm after UV irradiation		5.5
survival days of NO.146 worm after UV irradiation		5.5
survival days of NO.147 worm after UV irradiation		5.5
survival days of NO.148 worm after UV irradiation		5.5
survival days of NO.149 worm after UV irradiation		5.5
survival days of NO.150 worm after UV irradiation		5.5
survival days of NO.151 worm after UV irradiation		6
survival days of NO.152 worm after UV irradiation		6
survival days of NO.153 worm after UV irradiation		6
survival days of NO.154 worm after UV irradiation		6
