# Supplementary material for: Didymin improves UV irradiation resistance in C. elegans
Source: PeerJ. 2019 Jan 9;6:e6218. doi: 10.7717/peerj.6218 (PMC6330030; doi:10.7717/peerj.6218)
Supplement: Supplemental Information 5 [file peerj-07-6218-s005.xlsx]

## Sheet: figure 5
concentration of didymin	0 mM	0.1 mM		concentration of didymin	0 mM	0.1 mM		concentration of didymin	0 mM	0.1 mM
fluorescence intensity of NO. 1 TJ356 worm	3029	8904		fluorescence intensity of NO. 1 CF1553 worm	1893	3875		fluorescence intensity of NO. 1 CL2070 worm	7032	9045
fluorescence intensity of NO. 2 TJ356 worm	3310	8820		fluorescence intensity of NO. 2 CF1553 worm	1930	4042		fluorescence intensity of NO. 2 CL2070 worm	7136	9057
fluorescence intensity of NO. 3 TJ356 worm	3211	8519		fluorescence intensity of NO. 3 CF1553 worm	2043	4136		fluorescence intensity of NO. 3 CL2070 worm	7308	9834
fluorescence intensity of NO. 4 TJ356 worm	3400	7702		fluorescence intensity of NO. 4 CF1553 worm	2213	4421		fluorescence intensity of NO. 4 CL2070 worm	7304	9513
fluorescence intensity of NO. 5 TJ356 worm	3512	7430		fluorescence intensity of NO. 5 CF1553 worm	1845	4211		fluorescence intensity of NO. 5 CL2070 worm	7432	9452
fluorescence intensity of NO. 6 TJ356 worm	2984	8722		fluorescence intensity of NO. 6 CF1553 worm	1976	3965		fluorescence intensity of NO. 6 CL2070 worm	7530	9505
fluorescence intensity of NO. 7 TJ356 worm	3002	8304		fluorescence intensity of NO. 7 CF1553 worm	2394	4403		fluorescence intensity of NO. 7 CL2070 worm	7210	8034
fluorescence intensity of NO. 8 TJ356 worm	3129	7901		fluorescence intensity of NO. 8 CF1553 worm	1793	3745		fluorescence intensity of NO. 8 CL2070 worm	7081	9904
fluorescence intensity of NO. 9 TJ356 worm	2887	8001		fluorescence intensity of NO. 9 CF1553 worm	2034	4002		fluorescence intensity of NO. 9 CL2070 worm	6803	9560
fluorescence intensity of NO. 10 TJ356 worm	3602	8023		fluorescence intensity of NO. 10 CF1553 worm	1995	4099		fluorescence intensity of NO. 10 CL2070 worm	6944	9245
